# Supplementary material for: Histone deacetylase inhibitors inhibit cervical cancer growth through Parkin acetylation-mediated mitophagy
Source: PubMed Central journal article supplement — Acta Pharm Sin B. 2021 Jul 21;12(2):838–52. doi: 10.1016/j.apsb.2021.07.003 (PMC8897022; doi:10.1016/j.apsb.2021.07.003), 2021-07-21
Supplement: mmc3.pdf [file mmc3.pdf]

**Supporting Information for**

**Original article**

**Histone deacetylase inhibitors inhibit cervical cancer growth through Parkin acetylation-mediated mitophagy**

**Xin Sun<sup>a</sup>, Yuhan Shu<sup>d</sup>, Guiqin Ye<sup>c</sup>, Caixia Wu<sup>b</sup>, Mengting Xu<sup>d</sup>, Ruilan Gao<sup>e</sup>, Dongsheng Huang<sup>c,\*</sup>, Jianbin Zhang<sup>b,\*</sup>**

*<sup>a</sup>Department of Oncology, Zhejiang Provincial People's Hospital, Affiliated People's Hospital, Hangzhou Medical College, Hangzhou 310014, China*

*<sup>b</sup>Clinical Research Institute, Zhejiang Provincial People's Hospital, Affiliated People's Hospital, Hangzhou Medical College, Hangzhou 310014, China*

*<sup>c</sup>Key Laboratory of Tumor Molecular Diagnosis and Individualized Medicine of Zhejiang Province, Hangzhou Medical College, Hangzhou 310014, China*

*<sup>d</sup>College of Biomedical Engineering & Instrument Science, Zhejiang University, Hangzhou 310028, China*

*<sup>e</sup>Department of Hematology, the First Affiliated Hospital of Zhejiang Chinese Medical University, Hangzhou 310006, China*

Received 8 February 2021; received in revised form 30 May 2021; accepted 16 June 2021

\*Corresponding authors.

E-mail addresses: [zhangjianbin@hmc.edu.cn](mailto:zhangjianbin@hmc.edu.cn) (Zhang Jianbin), [dshuang@zju.edu.cn](mailto:dshuang@zju.edu.cn) (Huang Dongsheng).

Running title: Parkin acetylation enhances mitophagy

## 1. Supporting tables

**Table S1** The specific targets of Parkin under SAHA treatment was identified and listed.

**Table S2** GO analysis of the Parkin targets. The Parkin-targeted mitochondrial proteins and their molecular functions were listed.

| Molecular function          | Protein No. | Protein name                                                            |
|-----------------------------|-------------|-------------------------------------------------------------------------|
| Oxidoreductase              | 6           | ALDH18A1, ALDH5A1, ALDH1B1, ALDH2, ALDH5, ALDH3A2                       |
| Isocitrate dehydrogenase    | 4           | IDH3G, IDH2, IDH3B, IDH3A                                               |
| Phosphatase                 | 5           | PDP1, TIMM50, PPP3CA, PPP1CC, PTEN                                      |
| C-Acetyltransferase         | 7           | ACAA2, GCAT, ACSL3, ACAT1, SCP2, HADHA, HADHB                           |
| Voltage-gated anion channel | 4           | CLIC4, VDAC2, VDAC3, VDAC1                                              |
| Peroxidase                  | 4           | PRDX4, PRDX3, CAT, PRDX1                                                |
| Transmembrane transporter   | 9           | ATP6V1A, UQCRC1, ATP6V1E1, ATP5F1, ATP5O, COX5A, MON2, SLC25A4, SLC25A5 |
| Hexokinase                  | 2           | HK2, HK1                                                                |
| Succinate dehydrogenase     | 2           | SDHA, SDHB                                                              |
| Creatine kinase             | 2           | CKMT1A, CKB                                                             |
| Succinyltransferase         | 2           | DLST, ALAS1                                                             |

**Table S3** The detailed MS spectra of Parkin acetylation sites are shown.

## 2. Supporting figures

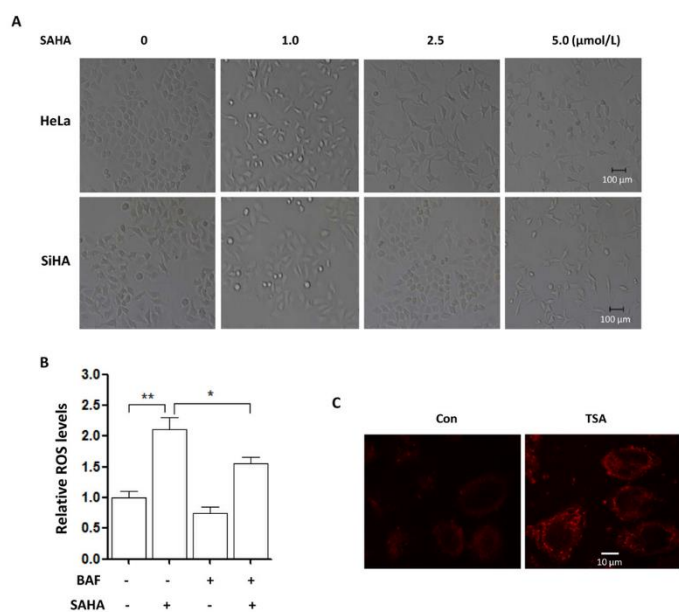

**Figure S1** Autophagy inhibition attenuates ROS production under SAHA treatment. (A) Morphology of HeLa and SiHA cells was captured using a phase contrast microscopy. Scale bar=100  $\mu\text{m}$ . (B) HeLa cells were transfected with the mKeima-Red-Mito-7 plasmid, followed by treatment with TSA (0.5  $\mu\text{mol/L}$ , 1 h). The fluorescence was detected by confocal microscope. Scale bar=10  $\mu\text{m}$ . (C) SiHA cells were given SAHA treatment with or without bafilomycin A1 (10 nmol/L). Mitochondrial ROS was detected by MitoTracker™ Red CMXRos staining and quantified by flow cytometry. \* $P < 0.05$ , \*\* $P < 0.01$ .

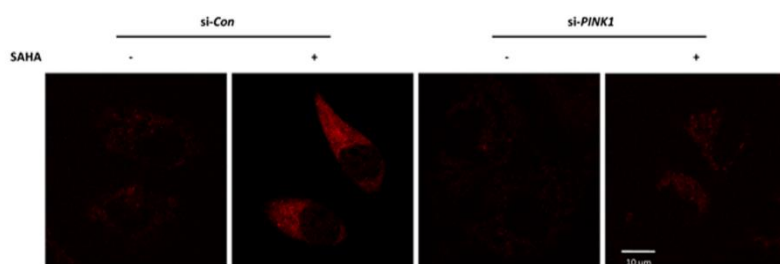

**Figure S2** SAHA-induced mitophagy depends on the PINK1 pathway. SiHA cells expressing mKeima-Red-Mito-7 were first transfected with the *PINK1*-specific siRNA and then cells were treated with SAHA (5  $\mu\text{mol/L}$ , 12 h). The fluorescence was detected by Confocal Microscope. Scale bar=10  $\mu\text{m}$ .

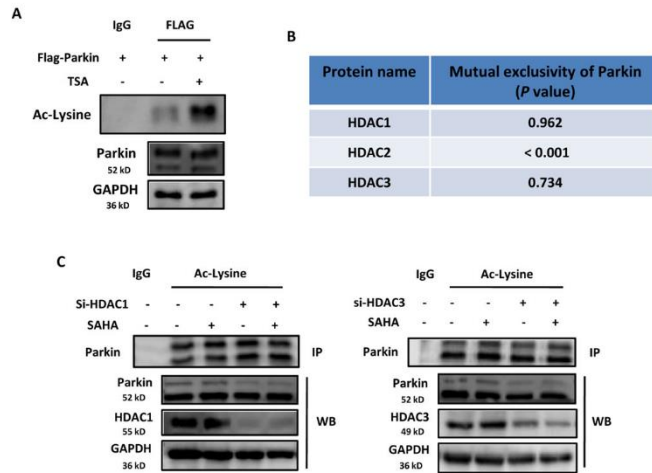

**Figure S3** HDAC inhibition leads to Parkin acetylation. (A) HEK293 cells were transiently transfected with Flag-Parkin and then treated with 1  $\mu$ mol/L TSA for 12 h. Cells were lysed and subjected to FLAG immunoprecipitation followed by immunoblotting for acetyl-lysine. (B) Analysis of mutual exclusivity of Parkin with HDAC1/2/3 using cBioPortal for Cancer Genomics. (C) HEK293 cells were transiently transfected with Flag-Parkin, together with specific siRNA for *HDAC1* or *HDAC3*. After SAHA treatment, cell lysates were prepared and immunoprecipitated with acetyl-lysine and immunoblotted for Parkin.

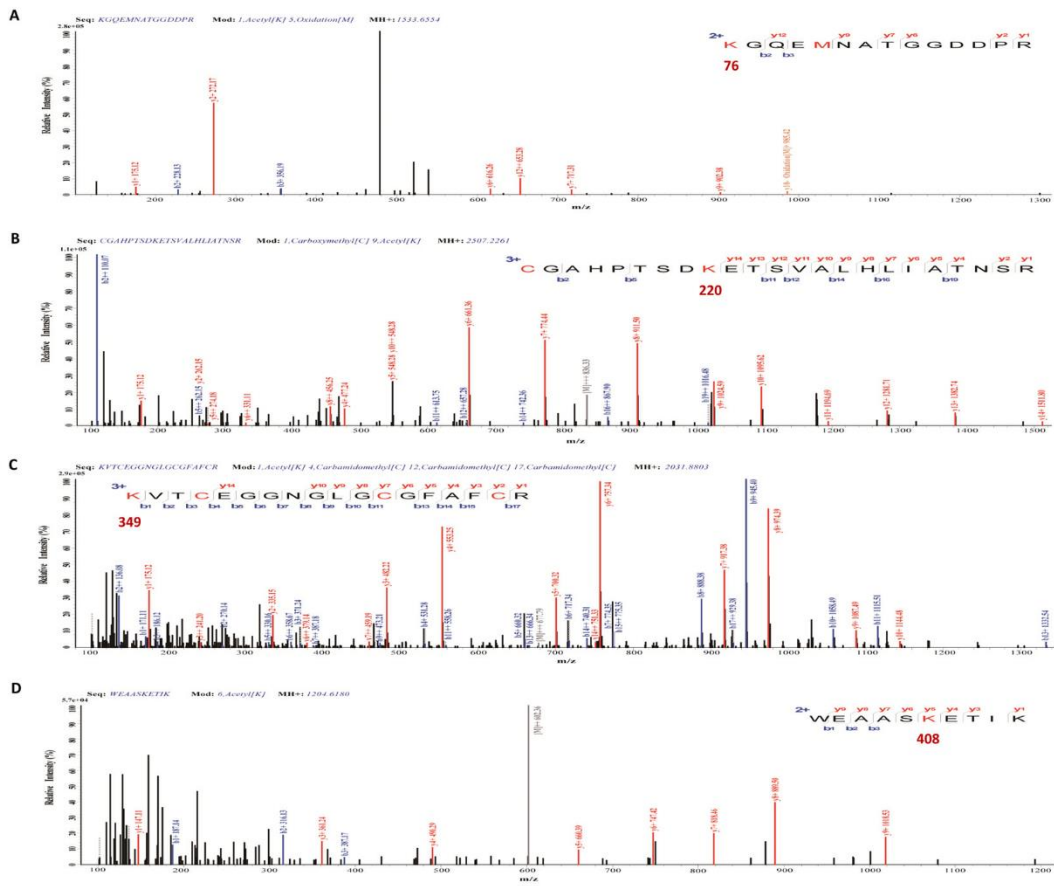

**Figure S4** The LC-MS spectra of the peptide contains the acetylated K76, K220, K349, and K408. Fragment ions containing acetylated lysine are denoted by red color.

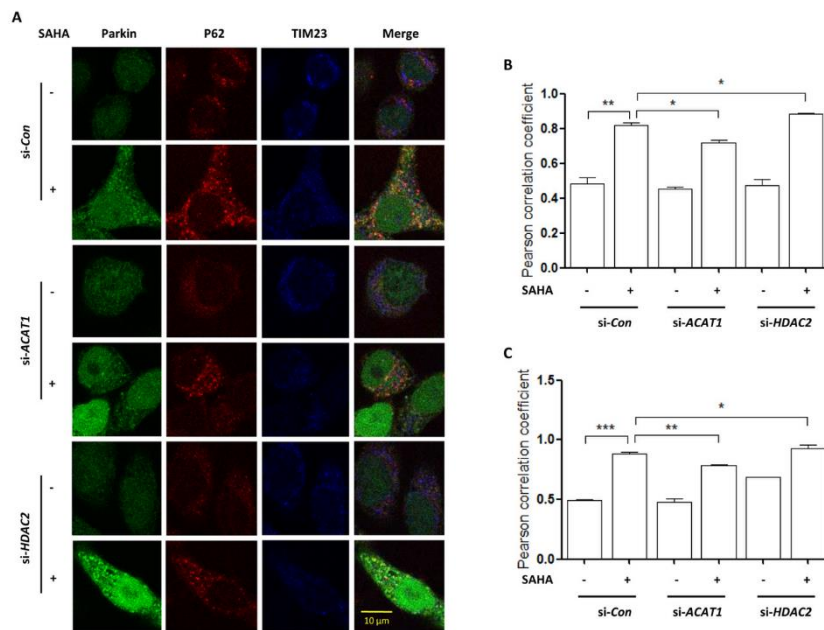

**Figure S5** ACAT1 and HDAC2 control Parkin translocation to mitochondria under SAHA treatment. (A) and (B) HeLa cells with YFP-Parkin overexpression were

transfected with specific siRNA for *ACAT1* or *HDAC2*, respectively, and treated with SAHA (5  $\mu\text{mol/L}$ , 12 h). Confocal imaging of P62 (red) and TIM23 (blue) was conducted. Scale bar=10  $\mu\text{m}$ . ImageJ was used to analyze their colocalization and statistics was performed. \* $P<0.05$ , \*\* $P<0.01$ , \*\*\* $P<0.001$ . (C) ImageJ was used to analyze the colocalization of GFP-LC3, LAMP1 and TIM23, and statistics was performed.

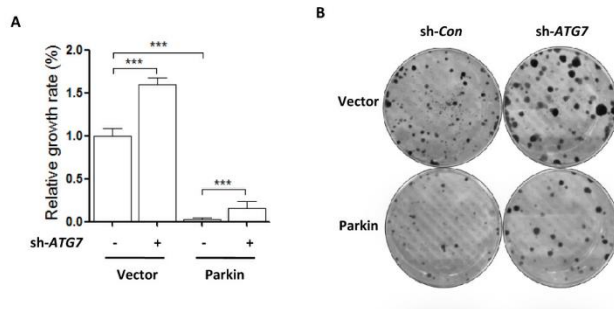

**Figure S6** Knockdown of *ATG7* attenuates the inhibitory effect of Parkin on cell growth. HeLa cells with or without Parkin expression were infected with lentivirus expressing nonspecific shRNA or specific shRNA for *ATG7*. (A) Cells were seeded into 96-well plate and cell proliferation was measured by adding CCK-8 solution. The absorbance was measured at 450 nm using microplate spectrophotometer and statistically analyzed. \*\*\* $P<0.001$ . (B) Cells were seeded into 6-well plate and colony formation assay was performed to determine cell proliferation. After crystal violet staining, the formed colonies were photographed.

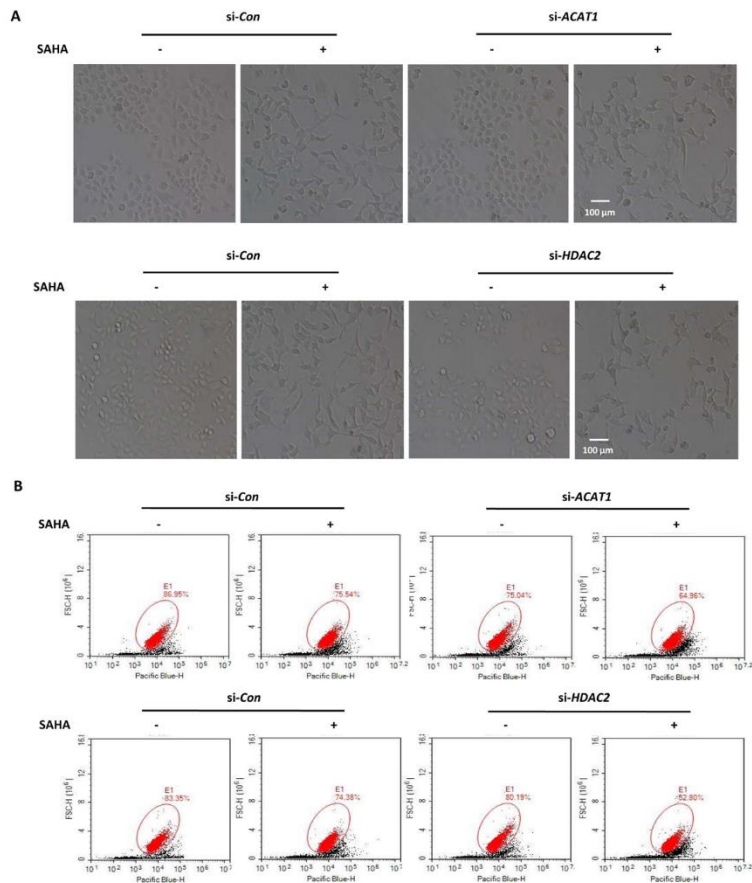

**Figure S7** ACAT1 and HDAC2 regulate cell death by SAHA treatment. SiHA cells were first transfected with specific siRNA for *ACAT1* or *HDAC2*, and then treated with SAHA (5  $\mu\text{mol/L}$ , 24 h). (A) Cell morphology was photographed using a phase-contrast microscope. Scale bar=100  $\mu\text{m}$ . (B) Cells were stained using the Annexin V, Pacific Blue™ conjugate and cell fluorescence was shown in flow cytometry graph.

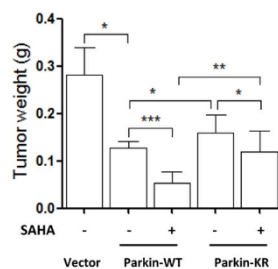

**Figure S8** Parkin mutation attenuates the anticancer activity of SAHA treatment. The average tumor weight for each group was calculated and statistically analyzed.

\*  $P < 0.05$ , \*\*  $P < 0.01$ , \*\*\*  $P < 0.001$ .
